# Supplementary material for: Breast Reconstruction after Surgery for Breast Cancer
Source: Atypon-hosted journal article supplement (doi:10.1056/nejmct0802899), 2008-10-08
Supplement: nejm_cordeiro_1590sa1.pdf [file nejm_cordeiro_1590sa1.pdf]

## Supplementary Appendix

This appendix has been provided by the author to give readers additional information about his work.

Supplement to: Cordeiro PG. Breast reconstruction after surgery for breast cancer. *N Engl J Med* 2008;359:1590-601.

**Clinical Therapeutics**  
**Breast Reconstruction after Surgery for Breast Cancer**  
**Online Supplementary Appendix**

**Peter G. Cordeiro, M.D., FACS**  
**Chief, Plastic & Reconstructive Surgery Service**  
**Department of Surgery, Memorial Sloan-Kettering Cancer Center**  
**Professor of Surgery, Weill Medical College of Cornell University**

## Photograph Legends

- 1 Oblique view of a unilateral breast reconstruction (left) using a breast implant. Note relative lack of ptosis left breast.
- 2 Oblique view of a bilateral breast reconstruction with implants and subsequent nipple areola reconstruction. Note excellent breast symmetry achieved.
- 3 Oblique view of a unilateral, pedicled TRAM flap breast reconstruction (right) and reduction mammoplasty (left). Note degree of left breast ptosis achieved using the TRAM flap.
- 4 Oblique view of a unilateral, free TRAM flap breast reconstruction (left) performed following a skin-sparing mastectomy. Nipple-areolar complex reconstruction (left) completed. Note symmetry with respect to degree of breast ptosis achieved.

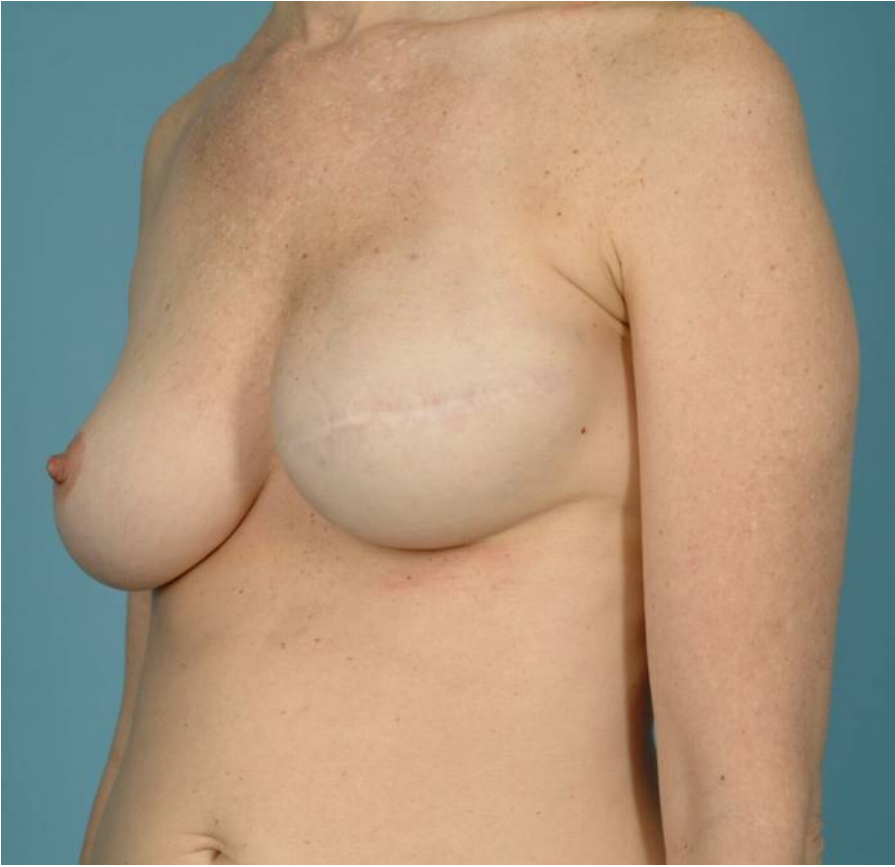

Photograph 1

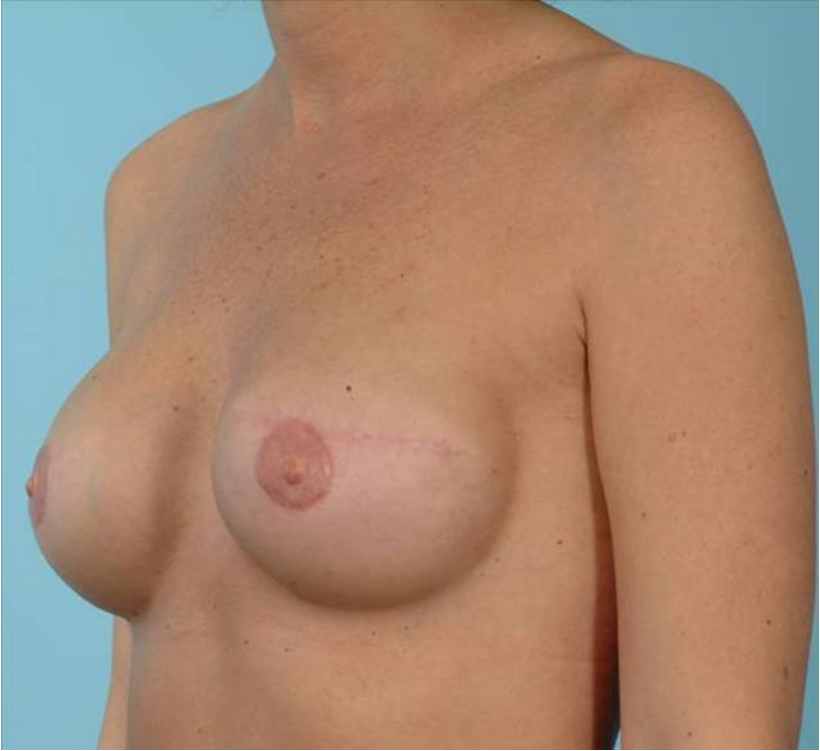

Photograph 2

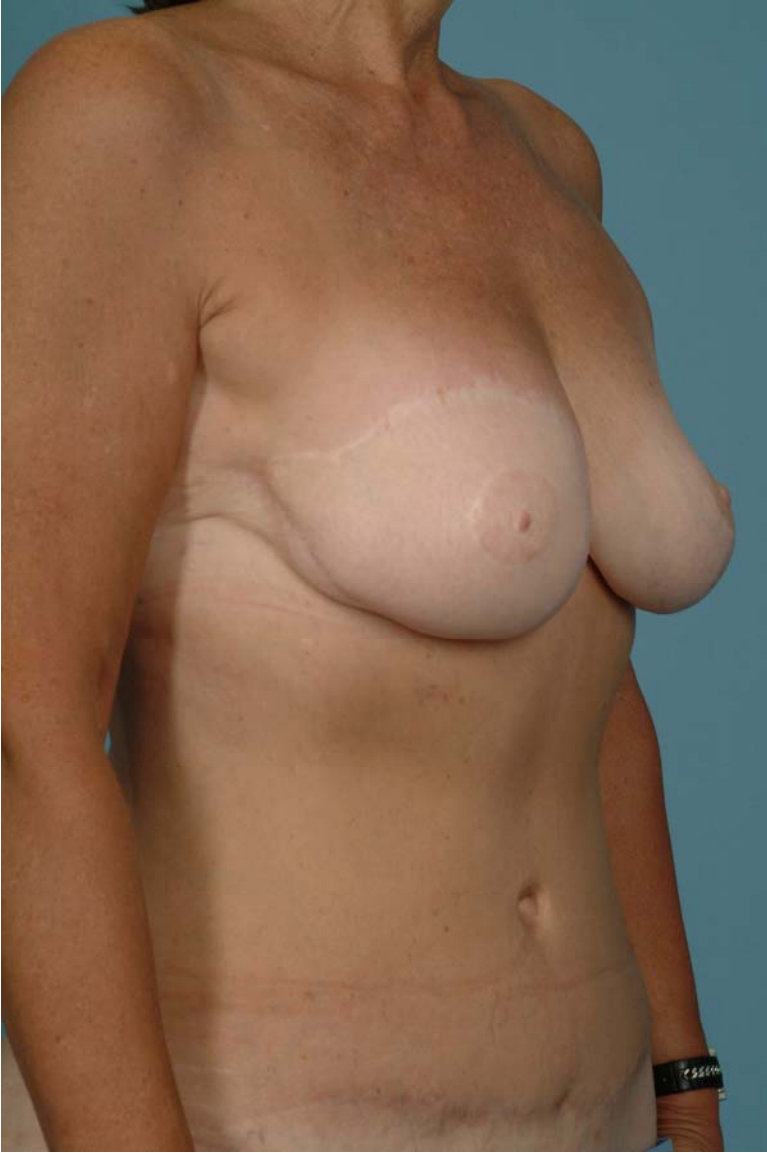

Photograph 3

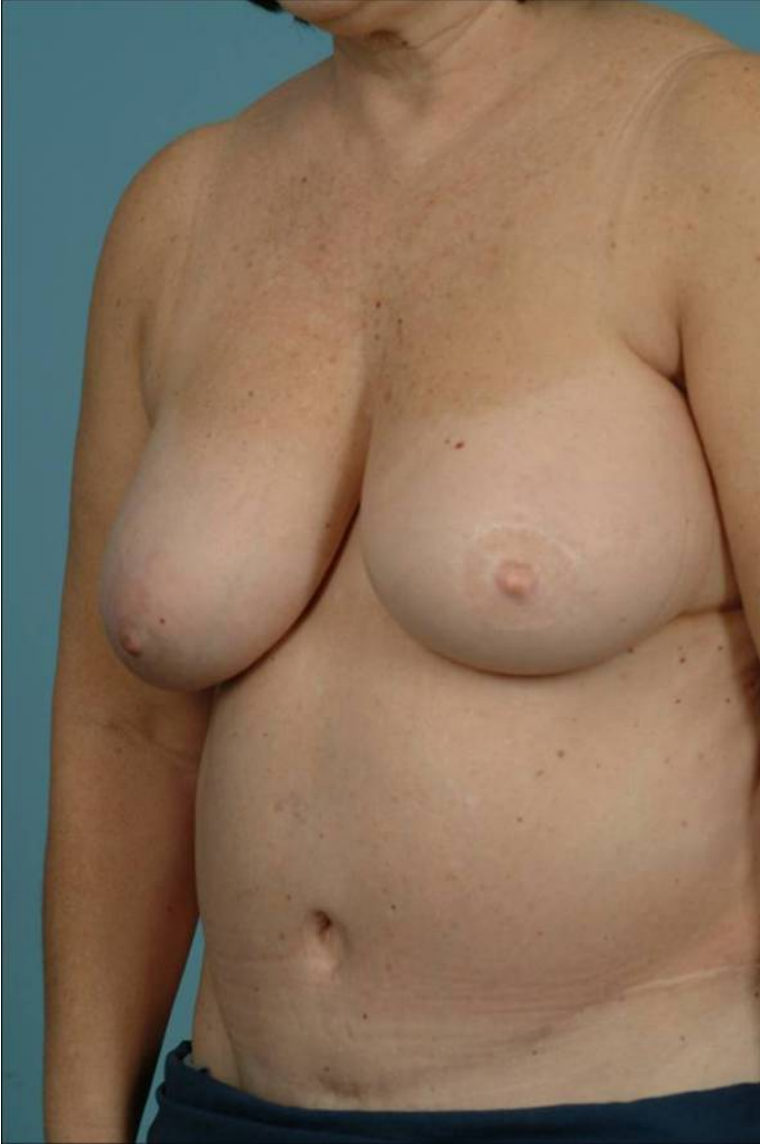

Photograph 4
